# Supplementary material for: Collaboration between the Fab and Fc contribute to maximal protection against SARS-CoV-2 in nonhuman primates following NVX-CoV2373 subunit vaccine with Matrix-M™ vaccination
Source: bioRxiv or medRxiv preprint supplement (doi:10.1101/2021.02.05.429759), 2021-02-05

A

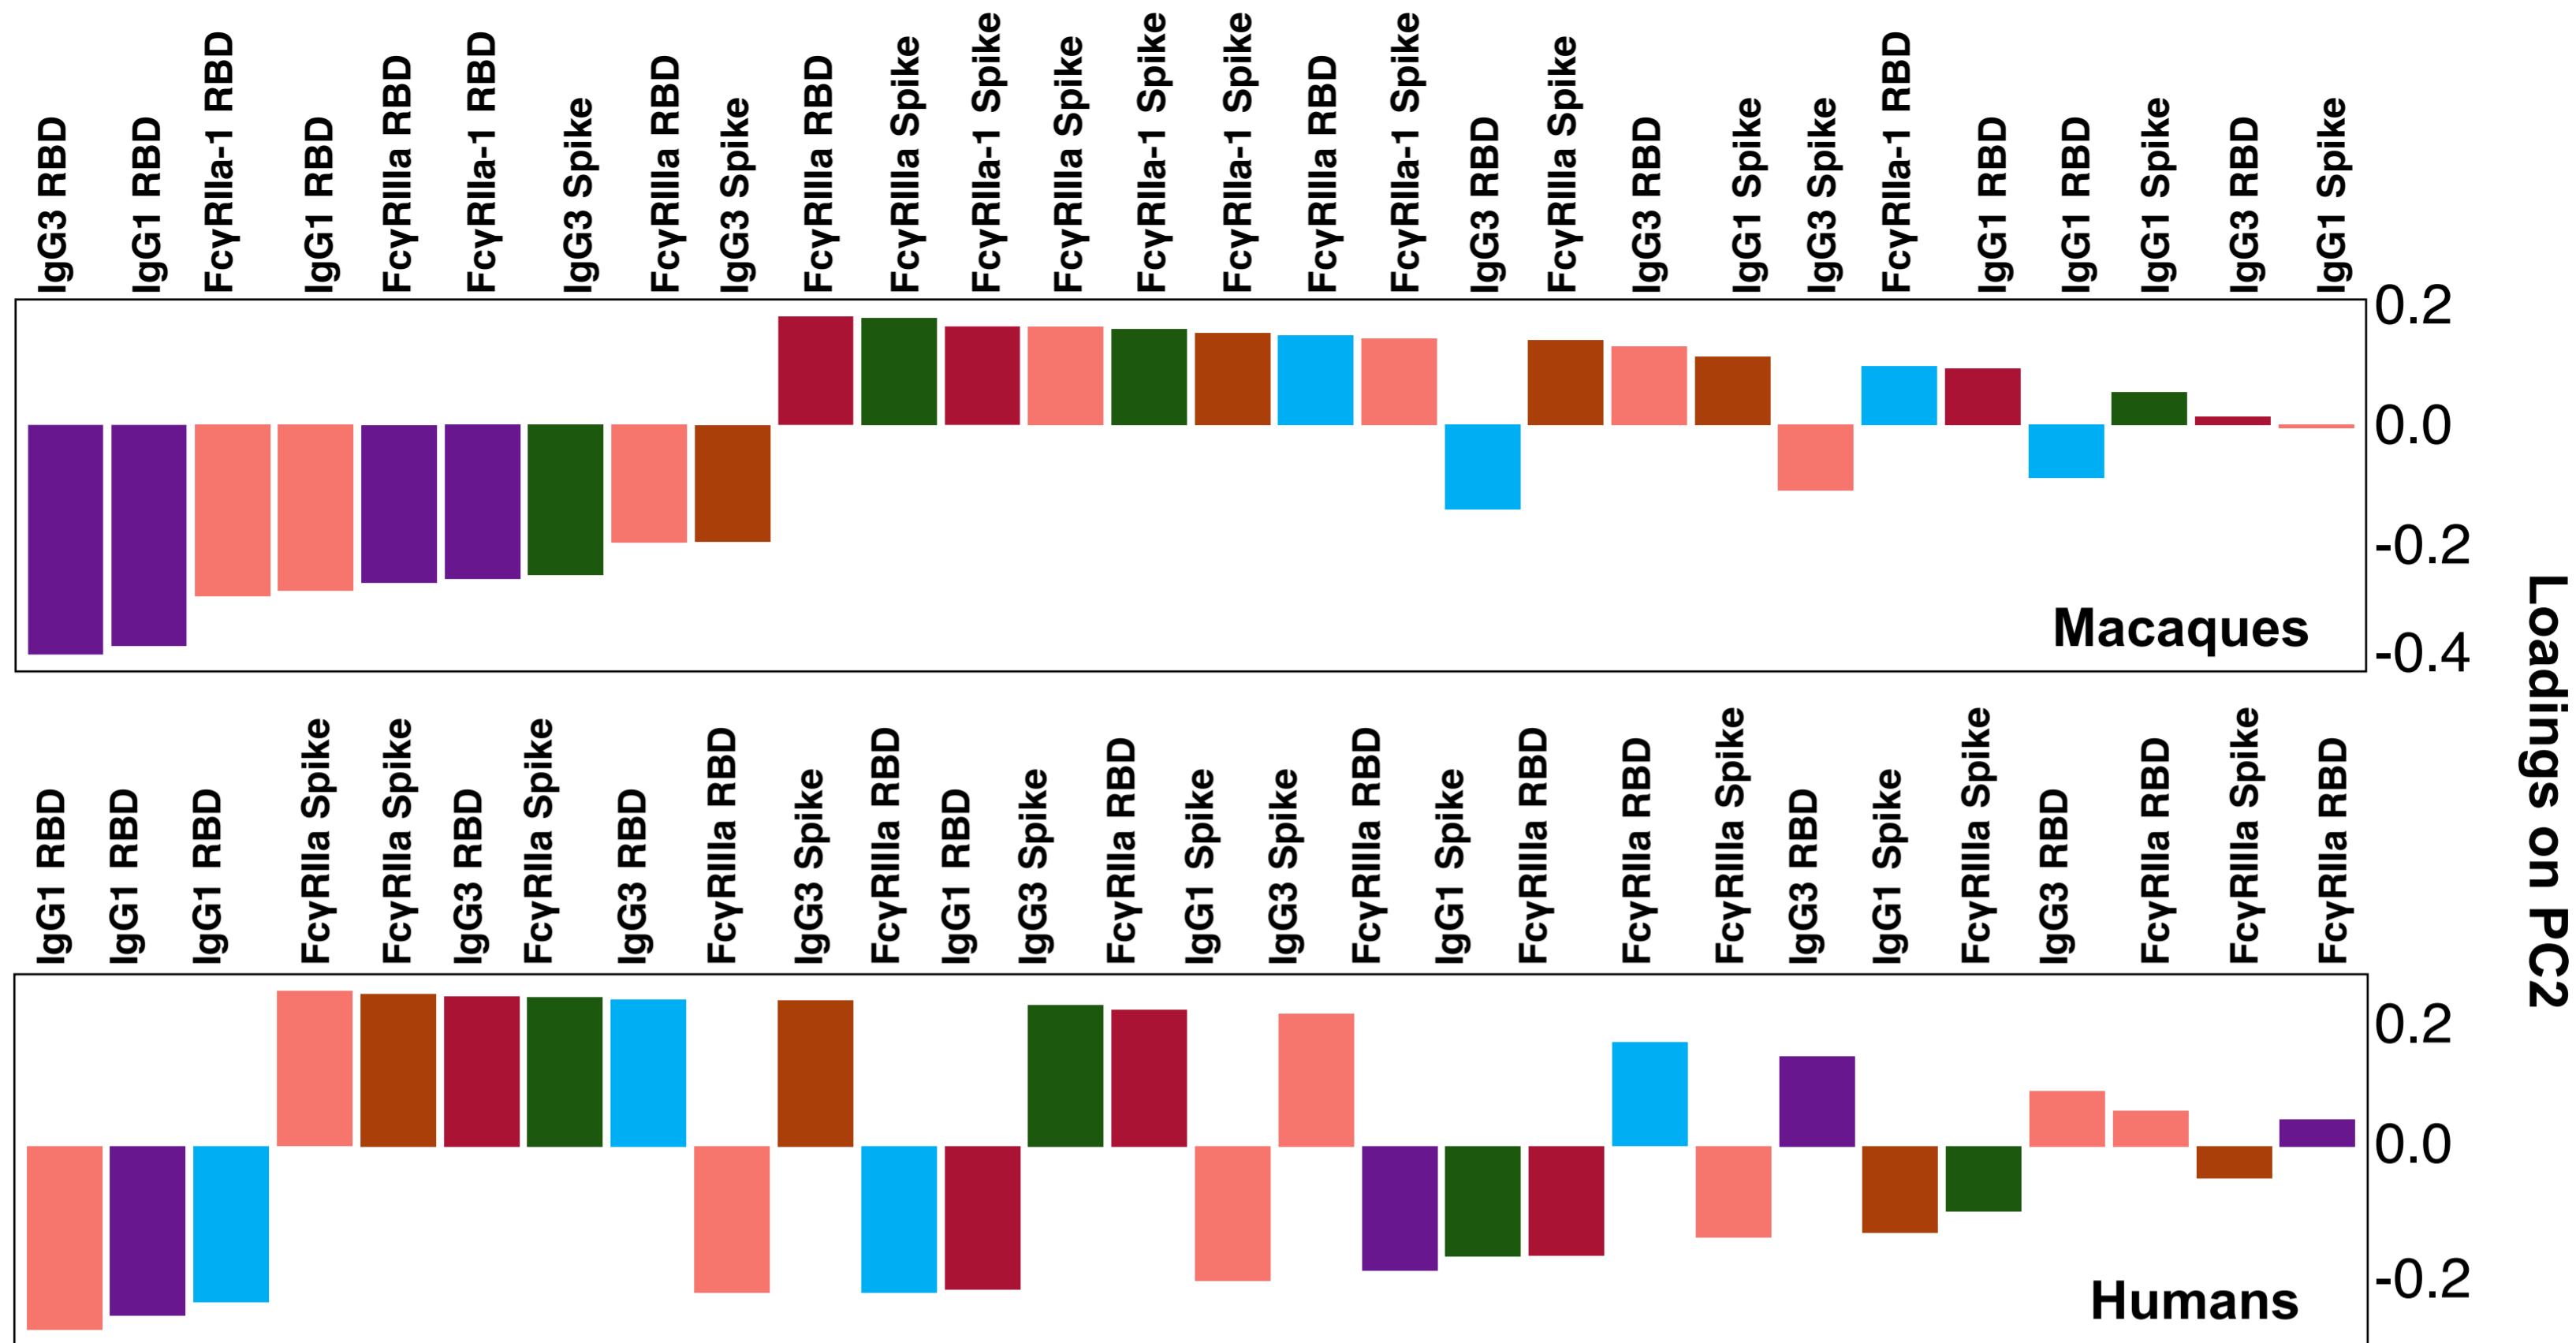

B

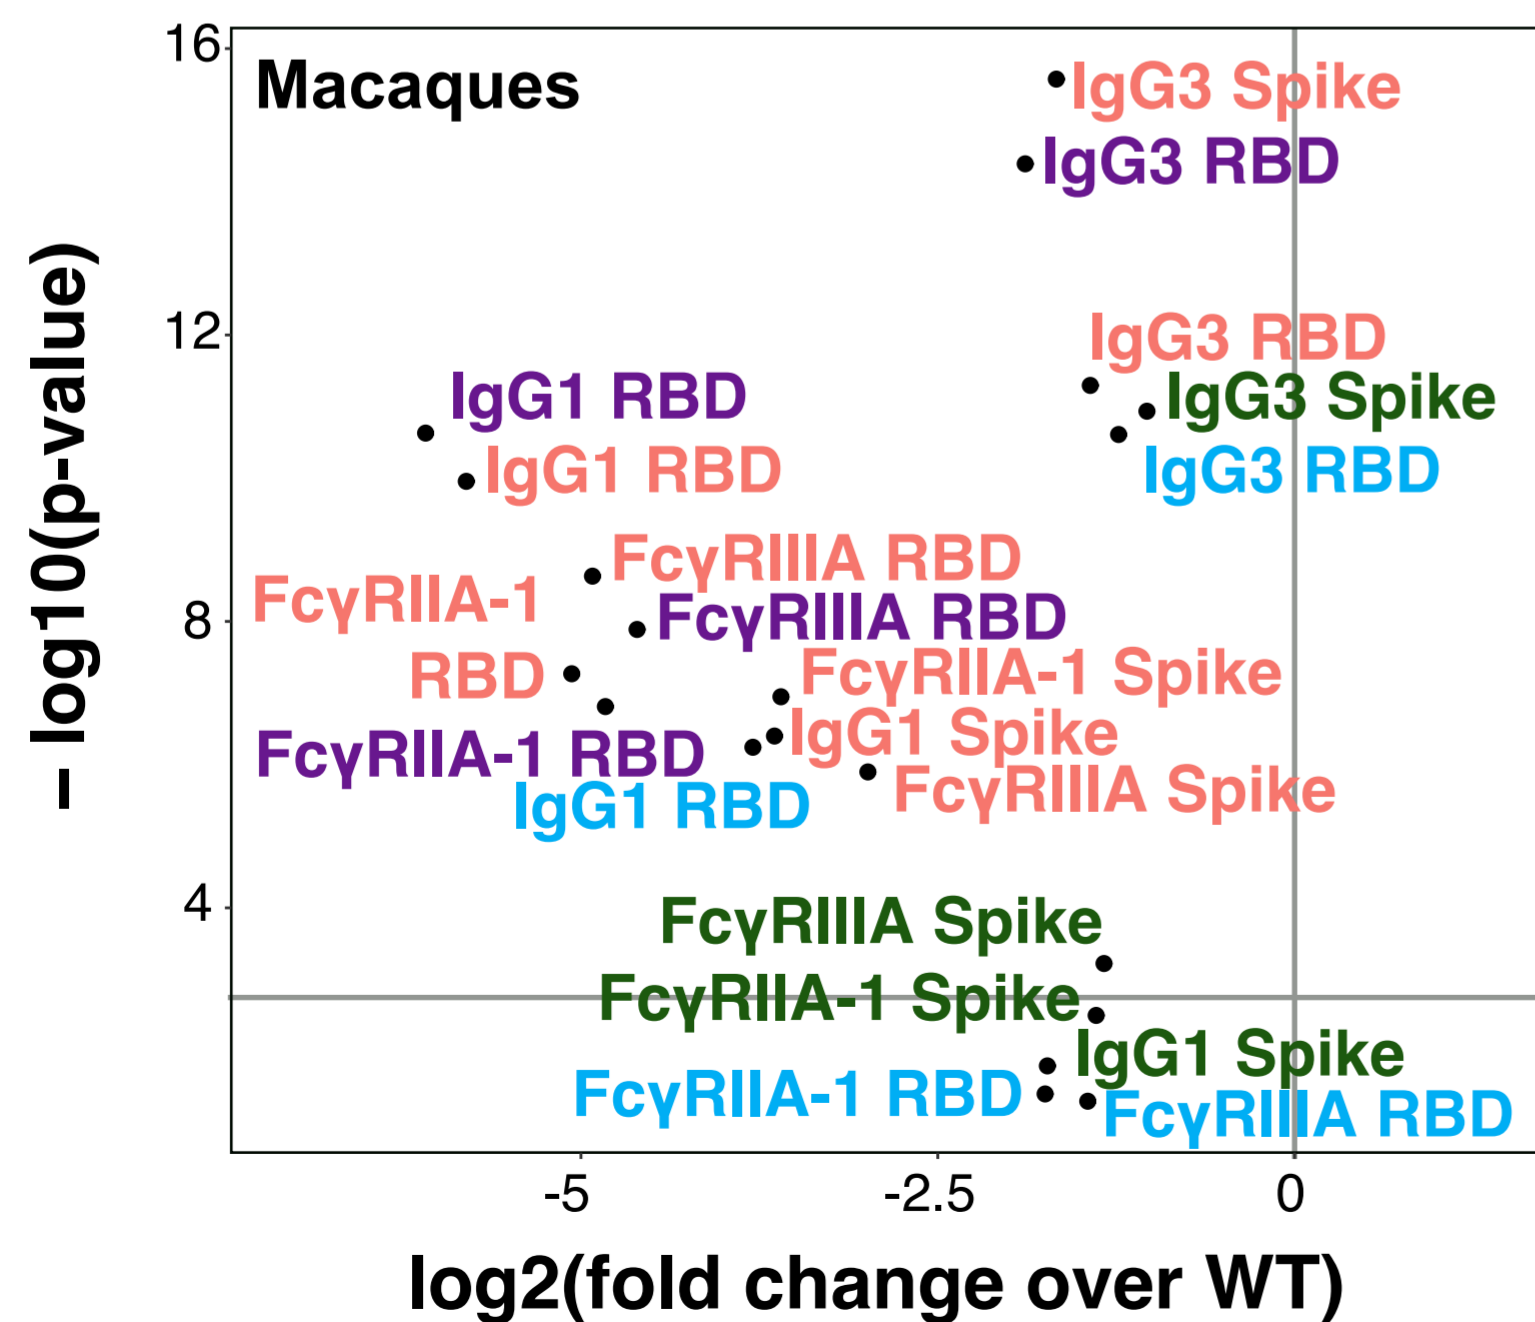

C

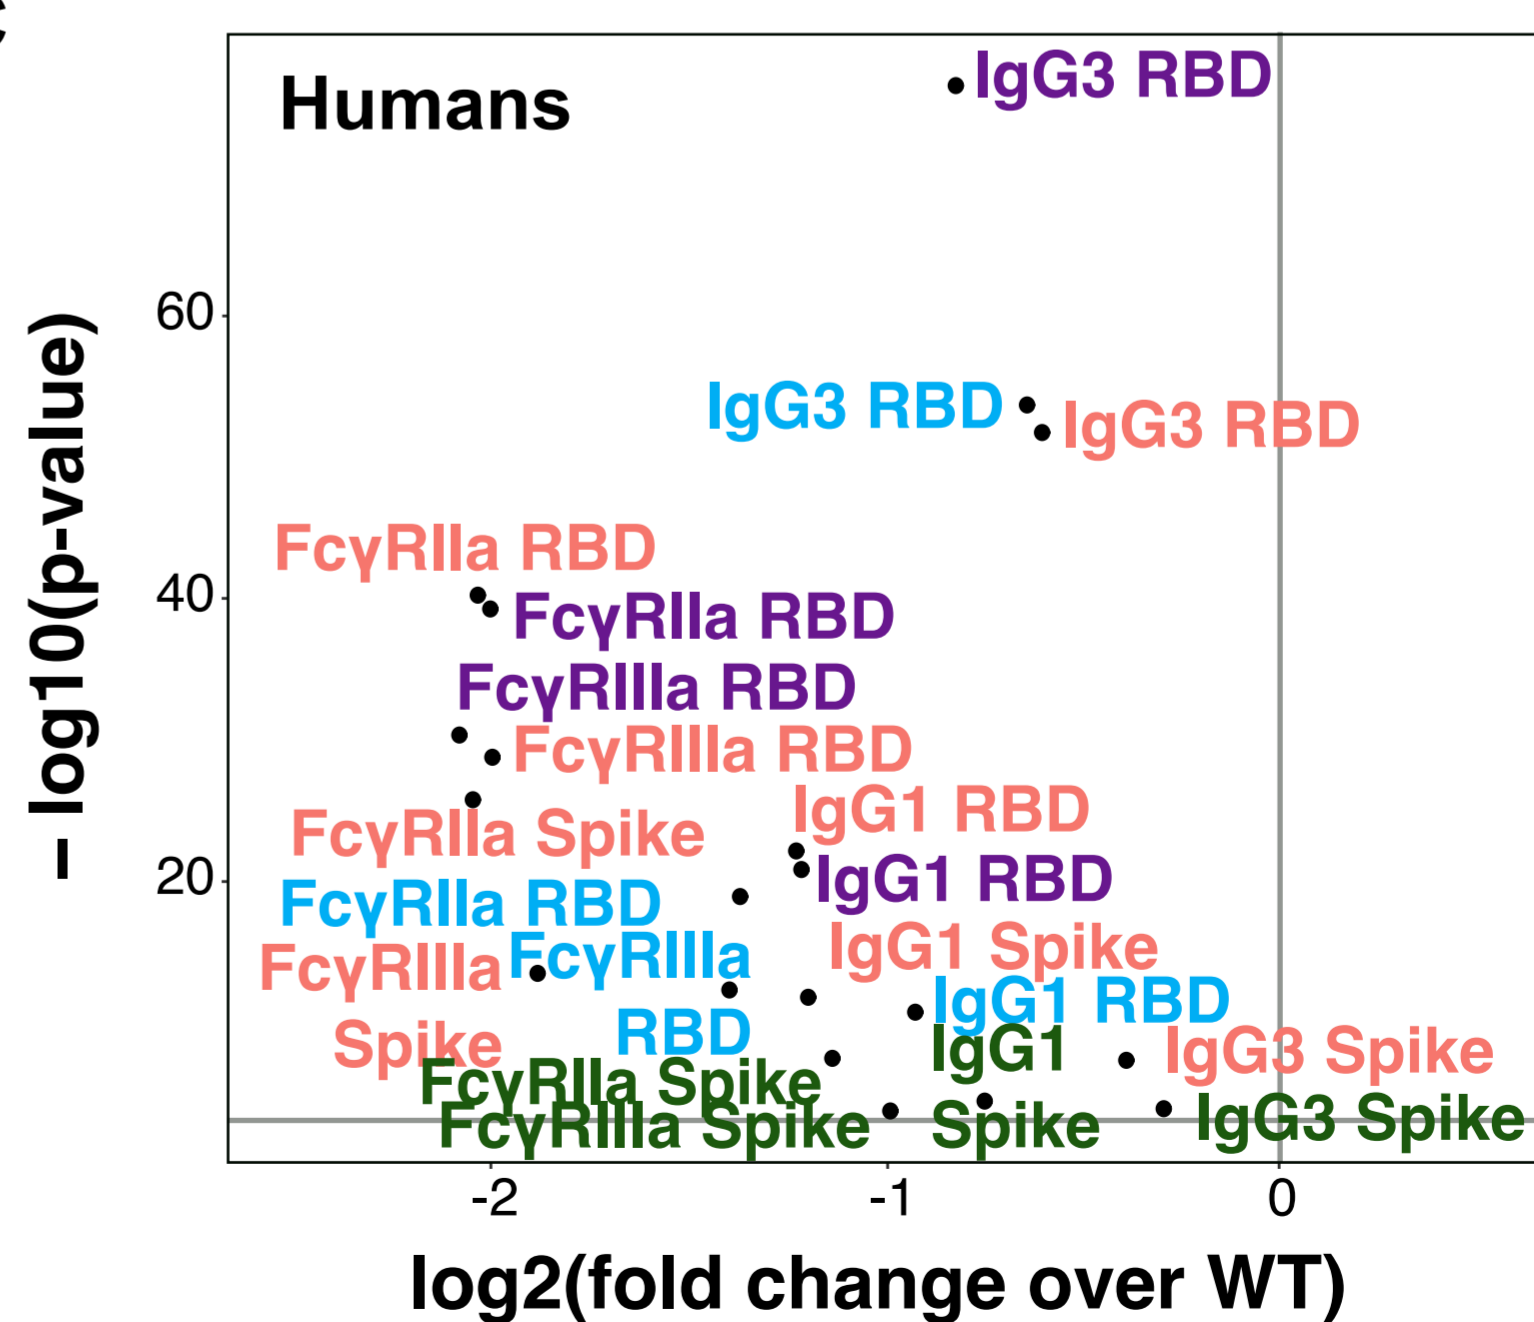

Supplement: Supplementary file [file media-2.pdf]
